# Supplementary material for: PharmaKU: A Web-Based Tool Aimed at Improving Outreach and Clinical Utility of Pharmacogenomics
Source: MDPI journal article supplement (doi:10.3390/jpm11030210), 2021-03-16
Supplement: s1 [file s1]

## PharmaKu - Personal Pharmacogenomics Report

**Name/Description:**

**Uploaded VCF: 11369.vcf**

**Date: 31/12/2020 08:47**

| Gene    | Genotype | Allele Functionality                       | Phenotype                 | Clinical Recommendation* |
|---------|----------|--------------------------------------------|---------------------------|--------------------------|
| CYP2C19 | *1/*17   | 1 Normal function and 1 Increased function | CYP2C19 Rapid Metabolizer | Adjust Dose              |
| CYP2C9  | *1/*1    | 2 Normal function                          | CYP2C9 Normal Metabolizer | Usual Dose               |
| CYP2D6  | *2/*119  | 1 Normal function and 1 Unknown function   | Indeterminate             |                          |
| TPMT    | *1/*1    | 2 Normal Function                          | TPMT Normal Metabolizer   | Usual Dose               |
| UGT1A1  | *60/*60  | 2 Normal function                          |                           |                          |
| SLCO1B1 | *1/*1B   | 2 Normal function                          |                           |                          |
| CYP2B6  | *1/*1    | 2 Normal function                          | CYP2B6 Normal Metabolizer | Usual Dose               |
| CYP3A5  | *3/*3    | 2 No function                              | CYP3A5 Poor Metabolizer   | Adjust Dose              |
| NUDT15  | *1/*1    | 2 Normal Function                          | NUDT15 Normal Metabolizer | Usual Dose               |

\* See below for the drug dosage adjustments

## Interpretation - Consult Note

### CYP2C19

This result signifies that the patient has one copy of a normal function allele and one copy of an increased function allele. Based on the genotype result this patient is predicted to be a rapid metabolizer of CYP2C19 substrates. This patient may be at risk for an adverse or poor response to medications that are metabolized by CYP2C19. To avoid an untoward drug response, dose adjustments or alternative therapeutic agents may be necessary for medications metabolized by CYP2C19. Please consult a clinical pharmacist for more information about how CYP2C19 metabolic status influences drug selection and dosing.

#### Voriconazole

"Pediatrics: Based on the genotype result, this patient is predicted to be a CYP2C19 Rapid Metabolizer and the probability of attainment of therapeutic concentrations is variable. Initiate therapy with recommended standard of care dosing. Meticulous therapeutic drug monitoring to titrate dose to therapeutic trough concentrations is critical due to large variability in trough concentrations in rapid metabolizers.

Adults: Based on the genotype result, this patient is predicted to be a CYP2C19 Rapid Metabolizer and the probability of attainment of therapeutic concentrations is modest. Choose an alternative agent that is not dependent on CYP2C19 metabolism as primary therapy instead of voriconazole such as isavuconazole, liposomal amphotericin B or posaconazole. Selection of an alternative agent should be based upon other clinical factors such as drug interactions, hepatic and/or renal function, suspected or document fungal species, site of infection, and comorbidities. "

#### Drugs that are affected by CYP2C19:

Amitriptyline, Citalopram, Clopidogrel, Escitalopram, Voriconazole, Sertraline, Clomipramine, Dexlansoprazole, Doxepin, Esomeprazole, Imipramine, Lansoprazole, Omeprazole, Pantoprazole, Rabeprazole, Trimipramine, Brivaracetam, Carisoprodol, Clobazam, Diazepam, Flibanserin

### CYP2C9

This result signifies that the patient has two copies of a normal function allele. Based on the genotype result, this patient is predicted to be a CYP2C9 Normal metabolizer. Based only on the CYP2C9 genotype, there is no reason to adjust the dose of most medications that are affected by CYP2C9. Please consult a clinical pharmacist for more specific information about how CYP2C9 function influences drug dosing.

#### Phenytoin

HLA-B\*15:02 genotype may be important for phenytoin adverse events. An HLA-B\*15:02 genotype does not appear to have been ordered for this patient. Use of an alternative antiepileptic may be recommended. Please consult a clinical pharmacist for more information.

#### Drugs that are affected by CYP2C9:

Phenytoin, Warfarin, Siponimod, Tafenoquine, Acenocoumarol, Celecoxib, Flurbiprofen, Diclofenac, Flibanserin,

Lesinurad

## CYP2D6

No interpretation available

### Drugs that are affected by CYP2D6:

Amitriptyline, Atomoxetine, Codeine, Fluvoxamine, Nortriptyline, Ondansetron, Paroxetine, Tamoxifen, Clomipramine, Desipramine, Doxepin, Imipramine, Trimipramine, Oxycodone, Pitolisant, Tramadol, Tropisetron, Aripiprazole, Brexpiprazole, Dextromethorphan, Eliglustat, Mirtazapine, Pimozide, Protriptyline, Quinidine, Risperidone, Sertraline, Venlafaxine, Vortioxetine, Donepezil, Iloperidone, Methylphenidate, Perphenazine, Carvedilol, Cevimeline, Clozapine, Darifenacin, Dolasetron, Duloxetine, Fesoterodine, Flecainide, Flibanserin, Fluoxetine, Haloperidol, Metoprolol, Modafinil, Olanzapine, Palonosetron, Propafenone, Propranolol, Quinine, Tamsulosin, Terbinafine, Tetrabenazine, Thioridazine, Timolol, Tiotropium, Tolterodine, Zuclopenthixol, Galantamine

## TPMT

No interpretation available

### Azathioprine

No recommendations available

### Mercaptopurine

No recommendations available

### Thioguanine

No recommendations available

### Drugs that are affected by TPMT:

Azathioprine, Mercaptopurine, Thioguanine

## UGT1A1

No interpretation available

### Drugs that are affected by UGT1A1:

Irinotecan, Belinostat, Dolutegravir, Pazopanib, Nilotinib, Atazanavir

## SLCO1B1

No interpretation available

### Drugs that are affected by SLCO1B1:

Cerivastatin, Simvastatin, Methotrexate, Pravastatin, Rosuvastatin

## CYP2B6

This result signifies that the patient has two copies of normal function alleles. Based on the genotype result

this patient is predicted to be an normal metabolizer of CYP2B6 substrates. There is no reason to selectively adjust the dose of most medications that are metabolized by CYP2B6. Please consult a clinical pharmacist for more information about how CYP2B6 metabolic status influences drug selection and dosing.

#### **Efavirenz**

No recommendations available

#### **Drugs that are affected by CYP2B6:**

Efavirenz, Methadone, Nevirapine

### **CYP3A5**

This result signifies that the patient has two copies of a no function allele. Patients with this genotype are expected to require standard tacrolimus dosing. Please consult a clinical pharmacist for more specific dosing information.

#### **Drugs that are affected by CYP3A5:**

Tacrolimus, Atazanavir, Cyclosporine, Midazolam, Sirolimus

### **NUDT15**

No interpretation available

#### **Thioguanine**

No recommendations available

#### **Drugs that are affected by NUDT15:**

Azathioprine, Thioguanine, Mercaptopurine
