# Supplementary material for: PharmaKU: A Web-Based Tool Aimed at Improving Outreach and Clinical Utility of Pharmacogenomics
Source: J Pers Med. 2021 Mar 16;11(3):210. doi: 10.3390/jpm11030210 (PMC7998233; doi:10.3390/jpm11030210)
Supplement: Supplementary file 1 [file jpm-11-00210-s001.zip › SupplementaryFiles/DrugsList.xlsx]

## Sheet: Sheet1
Drug	Class
amitriptyline	Nervous System/Psychoanaleptics/ Antidepressants/ Non-selective monoamine reuptake inhibitors
atazanavir	Antiinfectives For Systemic Use/Antivirals For Systemic Use/ Direct Acting Antivirals/ Protease inhibitors
atomoxetine	Nervous System/Psychoanaleptics/Psychostimulants, Agents Used For Adhd And Nootropics/ Centrally acting sympathomimetics
capecitabine	Antineoplastic And Immunomodulating Agents/ Antineoplastic Agents/ Antimetabolites/ Pyrimidine analogues
celecoxib	Antineoplastic And Immunomodulating Agents/ Antineoplastic Agents/ Other antineoplastic agent
citalopram	Nervous System/Psychoanaleptics/ Antidepressants/ Selective serotonin reuptake inhibitors
clomipramine	Nervous System/Psychoanaleptics/ Antidepressants/ Non-selective monoamine reuptake inhibitors
clopidogrel	Blood And Blood Forming Organs/ Antithrombotic Agents/ Platelet aggregation inhibitors excl. heparin
codeine	Respiratory System/ Cough And Cold Preparations/ Cough Suppressants, Excl. Combinations With Expectorants/ Opium alkaloids and derivatives
desipramine	Nervous System/Psychoanaleptics/ Antidepressants/ Non-selective monoamine reuptake inhibitors
doxepin	Nervous System/Psychoanaleptics/ Antidepressants/ Non-selective monoamine reuptake inhibitors
efavirenz	Antiinfectives For Systemic Use/ Antivirals For Systemic Use/ Direct Acting Antivirals/ Non-nucleoside reverse transcriptase inhibitors
escitalopram	Nervous System/Psychoanaleptics/ Antidepressants/ Selective serotonin reuptake inhibitors
fluorouracil	Antineoplastic And Immunomodulating Agents/ Antineoplastic Agents/ Antimetabolites/ Pyrimidine analogues
flurbiprofen	Musculo-skeletal System/ Antiinflammatory And Antirheumatic Products/ Antiinflammatory And Antirheumatic Products, Non-steroids/ Propionic acid derivatives
fluvoxamine	Nervous System/Psychoanaleptics/ Antidepressants/ Selective serotonin reuptake inhibitors
fosphenytoin	Nervous System/ Antiepileptics/ Antiepileptics/ Hydantoin derivatives
imipramine	Nervous System/ Psychoanaleptics/ Antidepressants/ Non-selective monoamine reuptake inhibitors
lansoprazole	Alimentary Tract And Metabolism/ Drugs For Acid Related Disorders/ Drugs For Peptic Ulcer And Gastro-oesophageal Reflux Disease (gord)/ Proton pump inhibitors
lornoxicam	Musculo-skeletal System/ Antiinflammatory And Antirheumatic Products/ Antiinflammatory And Antirheumatic Products, Non-steroids/ Oxicams
meloxicam	Musculo-skeletal System/ Antiinflammatory And Antirheumatic Products/ Antiinflammatory And Antirheumatic Products, Non-steroids/ Oxicams
nortriptyline	Nervous System/ Psychoanaleptics/ Antidepressants/ Non-selective monoamine reuptake inhibitors
omeprazole	Alimentary Tract And Metabolism/ Drugs For Acid Related Disorders/ Drugs For Peptic Ulcer And Gastro-oesophageal Reflux Disease (gord)/ Proton pump inhibitors
ondansetron	Alimentary Tract And Metabolism/ Antiemetics And Antinauseants/ Antiemetics And Antinauseants/ Serotonin (5HT3) antagonists
pantoprazole	Alimentary Tract And Metabolism/Drugs For Acid Related Disorders/Drugs For Peptic Ulcer And Gastro-oesophageal Reflux Disease (gord)/Proton pump inhibitors
paroxetine	Nervous System/Psychoanaleptics/Antidepressants/Selective serotonin reuptake inhibitors
phenytoin	Nervous System/ Antiepileptics/ Antiepileptics/ Hydantoin derivatives
piroxicam	Sensory Organs/Ophthalmologicals/Antiinflammatory Agents/Antiinflammatory agents, non-steroids
sertraline	Nervous System/Psychoanaleptics/ Antidepressants/ Selective serotonin reuptake inhibitors
simvastatin	Cardiovascular System/Lipid Modifying Agents/Lipid Modifying Agents, Plain/HMG CoA reductase inhibitors
tacrolimus	Dermatologicals/Other Dermatological Preparations/Agents for dermatitis, excluding corticosteroids
tamoxifen	Antineoplastic And Immunomodulating Agents/Endocrine Therapy/Hormone Antagonists And Related Agents/Anti-estrogens
tenoxicam	Sensory Organs/Ophthalmologicals/Antiinflammatory Agents/Antiinflammatory agents, non-steroids
trimipramine	Nervous System/ Psychoanaleptics/ Antidepressants/ Non-selective monoamine reuptake inhibitors
tropisetron	Alimentary Tract And Metabolism/ Antiemetics And Antinauseants/ Antiemetics And Antinauseants/ Serotonin (5HT3) antagonists
voriconazole	Antiinfectives For Systemic Use/Antimycotics For Systemic Use/Antimycotics For Systemic Use/Triazole derivatives
warfarin	Blood And Blood Forming Organs/Antithrombotic Agents/Antithrombotic Agents/Vitamin K antagonists
